# Supplementary material for: Simulation of absorption sites of acetone at ice: (0001) surface, bulk ice and small-angle grain boundaries
Source: Royal Society of Chemistry journal article supplement (doi:10.1039/b820918a), 2009-01-01
Supplement: b820918a.pdf [file b820918a.pdf]

## Supplementary data

- 1) Crystallographic data of the ice structure used in the force field calculations (after optimisation by the developed force field)

Unit Cell  $a = 4.7117 \text{ \AA}$   $b = 8.5422 \text{ \AA}$   $c = 7.7329 \text{ \AA}$   $\alpha = 90^\circ$   $\beta = 90^\circ$   $\gamma = 94.9218^\circ$

Space group  $P 1 1 2_1$

Symmetry operations  $x, y, z$   $-x, -y, z + 0.5$

Atomic coordinates

| Name | x       | y       | z       |
|------|---------|---------|---------|
| O1   | 0.73068 | 0.40455 | 0.26505 |
| O2   | 0.24918 | 0.91036 | 0.25491 |
| O3   | 0.25848 | 0.58161 | 0.14471 |
| O4   | 0.77622 | 0.08439 | 0.13485 |
| H5   | 0.73222 | 0.40532 | 0.39220 |
| H6   | 0.42535 | 0.97021 | 0.21652 |
| H7   | 0.07935 | 0.52471 | 0.18341 |
| H8   | 0.93547 | 0.02713 | 0.17598 |
| H9   | 0.73990 | 0.29634 | 0.22327 |
| H10  | 0.25093 | 0.80060 | 0.21678 |
| H11  | 0.41995 | 0.52470 | 0.18356 |
| H12  | 0.77556 | 0.08591 | 0.00767 |

- 2) Acetone-acetone interaction energies between molecules in neighbouring boxes (caused by long-range dipole-dipole interactions)

|                                   | distance of acetone molecules in different boxes<br>([uvw] directions in the monoclinic lattice) | interaction energy<br>/kJ mol <sup>-1</sup> |
|-----------------------------------|--------------------------------------------------------------------------------------------------|---------------------------------------------|
| <i>surface</i>                    |                                                                                                  |                                             |
| 3x2                               | 10 Å in [100]; 14 Å in [010]                                                                     | 0.1                                         |
| 10x10                             | 40 Å in [100]; 80 Å in [010]                                                                     | 0.01                                        |
| <i>bulk ice</i>                   |                                                                                                  |                                             |
| 3x2x2                             | 13 Å in [100]; 14 Å in [010]; 12 Å in [001]                                                      | 0.2                                         |
| 6x4x4                             | 26 Å in [100]; 31 Å in [010]; 27 Å in [001]                                                      | 0.02                                        |
| 9x8x8                             | 42 Å in [100]; 65 Å in [010]; 59 Å in [001]                                                      | 10 <sup>-4</sup>                            |
| <i>small-angle grain boundary</i> |                                                                                                  |                                             |
| Structure A                       | 11 Å in [100]; 30 Å in [010]; 47 Å in [001]                                                      | 0.1                                         |
| Structure A'                      | 20 Å in [100]; 48 Å in [010]; 88 Å in [001]                                                      | 0.04                                        |
| Structure B                       | 11 Å in [100]; 30 Å in [010]; 48 Å in [001]                                                      | 0.1                                         |
